# Supplementary material for: Observations of methane net sinks in the Arctic tundra
Source: Copernicus journal article supplement (doi:10.5194/egusphere-2024-1440), 2024-05-23
Supplement: Supplementary file [file egusphere-2024-1440-AC2-supplement.pdf]

**Article Review comments for: “Observations of methane net sinks in the Arctic tundra”,  
Biogeosciences, Manuscript ID: egusphere-2024-1440**

We thank the Reviewer for his/her careful assessment of our manuscript and his/her valuable suggestions. We found them very useful for improving and clarifying some of the information that was unclear in the submitted manuscript. Below, we respond to the comments in turn, and summarise modifications made to the manuscript. Our responses are formatted as follows:

Reviewer comments - **black text (bold)**

Author responses - black text

Revised manuscript text - **blue text (bold)**

Line numbers refer to those in the original submission.

**Reviewer #2:** RC2: 'Comment on egusphere-2024-1440' - <https://doi.org/10.5194/egusphere-2024-1440-RC2>

**General comments**

**The dataset presented in this manuscript is of high quality and is a unique time series of net CO<sub>2</sub> and CH<sub>4</sub> fluxes from an understudied ecosystem type in the Arctic, that nonetheless comprise the majority of the Arctic area. Thus, understanding the magnitude of CO<sub>2</sub> and CH<sub>4</sub> exchange with the atmosphere is relevant in the context of the Arctic carbon budget and how it responds to environmental change. The authors present and discuss the data in a concise and structured manner with good interpretation, although I recommend more careful interpretation of the relation between wind and net CH<sub>4</sub> uptake by including the interaction with soil hydrology. Also, the authors do not show this correlation, which I suspect is very variable and not better than the one for temperature.**

We strongly thank the Reviewer for the helpful and constructive review, which allowed us to make significant improvements, especially in the biogeochemical aspects of the work. Despite the Reviewer's valid observations that rightly point to soil hydrology measurements for understanding these processes, we unfortunately do not have any measurements available that can support such analyses. We use this recommendation to plan installations that support the existing infrastructure and adapt it for measurements that account for soil hydrology. In the revised version of the

manuscript, we add a figure with the scatter plot of CH<sub>4</sub> flux vs wind velocity (as suggested by the Reviewer). Also, the text within the manuscript was changed accordingly.

**There is a general switching between present and past tense in the entire manuscript which makes it confusing at times to read and halts the flow. Language itself is good but I strongly recommend you to make it either present or past tense throughout.**

In the new version of the manuscript, the past tense is used.

**Perhaps I am missing a little more discussion on the annual sums of CO<sub>2</sub> fluxes compared to other studies in the Arctic.**

We agree with the Reviewer, now in the revised version of the manuscript a comparative analysis with other Arctic studies has been included. Please, see the specific question below.

**I also suggest to add an analysis of the diurnal patterns for the different seasons as this would support the overall purpose of the manuscript.**

Thank you for the valuable suggestion. A daily cycle analysis was carried out for both CO<sub>2</sub> and CH<sub>4</sub> on a seasonal basis. This analysis and related figures have now been added below to answer your specific question.

### **Abstract**

**Line 25-27: This formulation “CH<sub>4</sub> fluxes...” is not very clear, because how is the reader supposed to understand how wind velocity is related to electron acceptors in the soil. There seems to be missing some information in between the wind and the soil, so please detail this**

Thank you for the suggestion. In the revised text of the manuscript the Abstract section was heavily rewritten. This sentence was deleted from the text.

**Abstract.** This study focuses on direct measurements of CO<sub>2</sub> and CH<sub>4</sub> turbulent eddy covariance fluxes in tundra ecosystems in the Svalbard Islands over a two-year period. Our results reveal dynamic interactions between climatic conditions and ecosystem activities such as photosynthesis and microbial activity. During summer, pronounced carbon uptake fluxes indicate increased

photosynthesis and microbial methane consumption, while during the freezing seasons very little exchange was recorded, signifying reduced activity. The observed net summertime methane uptake is correlated with the activation and aeration of soil microorganisms, and it declines in winter due to the presence of snow cover and because of the negative soil temperature **which triggers the freezing process of the active layer water content**, but then rebounds during the melting period. The CH<sub>4</sub> fluxes are not significantly correlated with soil and air temperature, but are instead associated with wind velocity, **which plays a role in the speed of soil drying. Nongrowing season emissions accounted for about 58% of the annual CH<sub>4</sub> budget, characterised by large pulse emissions.** The analysis of the impact of thermal anomalies on CO<sub>2</sub> and CH<sub>4</sub> exchange fluxes, underscores that high positive (> 5 °C) thermal anomalies may contribute to an increased positive flux **both in summer and winter periods, effectively reducing the net annual uptake.** These findings contribute valuable insights to our understanding of the dynamics of greenhouse gases in tundra ecosystems in the face of evolving climatic conditions. Further research is required to **constrain** the sources and sinks of greenhouse gases in dry upland tundra ecosystems, **to develop an effective reference for models in response to climate change.**

**Line 27-28: “High temperature anomalies...” Do they occur in winter/autumn/spring? Please clarify in text. Also, how does this respiration inhibit productivity? Do you mean that these anomalies decrease the annual net sink?**

The Authors agree that the statement can be misleading. This aspect is now addressed more clearly in the revised version.

**The analysis of the impact of thermal anomalies on CO<sub>2</sub> and CH<sub>4</sub> exchange fluxes, underscores that high positive (> 5 °C) thermal anomalies may contribute to an increased positive flux both in summer and winter periods, effectively reducing the net annual uptake.**

**Line 28-29: How much of the annual budget does the winter CH<sub>4</sub> emission constitute? I think you should add that number here**

This quantity has now been added as suggested by the Reviewer, as follow:

**Nongrowing season emissions accounted for about 58% of the annual CH<sub>4</sub> budget, characterised by large pulse emissions.**

**Line 29: replace “comprehending” with “understanding” or “measuring”**

Thanks, suggested corrections have been implemented in the paper

**Line 30: replace “elucidate” with “constrain”**

Thanks, suggested corrections have been implemented in the paper

## **Introduction**

**Line 37: delete “affect the...”**

Done, thanks for the suggestion.

**Line 47: “absorption” Do you mean “net uptake”? If so, I suggest to write this. Merge this sentence with the next by deleting “This is” and replace “that season” with “growing season”.**

The sentence has been rewritten according to the Reviewer's suggestions.

**Line 51: I would here use “soil hydrology” instead of “water levels”**

Thanks for your suggestion. We replaced “water levels” with “soil hydrology”.

**Line 53: I do not think the Kleber et al. 2023 citation fits in here as this relates to glacier retreat and release of thermogenic methane. So I suggest to remove it**

Thanks for your valuable suggestion. In the revised version of the manuscript this reference has been removed.

**Line 55-64: I suggest to delete this entire paragraph. It is kind of trivial for the interested reader for your paper. No need to use space on this and in the next paragraph you get to the primary knowledge gap which is the dry tundra ecosystems.**

The Reviewer's observation is appreciated. The paragraph has been shortened, retaining the most significant parts of the text, as follows:

**Methane uptake occurs in the atmosphere through chemical and/or photochemical oxidation, or biologically in soil and in water, through methane-oxidising bacteria and archaea (hereafter methanotrophy) that use methane as a source of energy and carbon (Serrano-Silva et al., 2014).**

**Line 76-90: Overall a good wrap up of existing papers on net CH<sub>4</sub> uptake in dry tundra soils. A few updated papers came out recently that might be of interest for you as well:**

- **Juncher Jørgensen, C., Schlaikjær Mariager, T., & Riis Christiansen, J. (2024). Spatial variation of net methane uptake in Arctic and subarctic drylands of Canada and Greenland. *Geoderma*, 443, 116815. <https://doi.org/10.1016/j.geoderma.2024.116815>**
- **D'Imperio, L., Li, B.-B., Tiedje, J. M., Oh, Y., Christiansen, J. R., Kepfer-Rojas, S., Westergaard-Nielsen, A., Brandt, K. K., Holm, P. E., Wang, P., Ambus, P., & Elberling, B. (2023). Spatial controls of methane uptake in upland soils across climatic and geological regions in Greenland. *Communications Earth & Environment*, 4(1), 461. <https://doi.org/10.1038/s43247-023-01143-3>**

We thank the Reviewer for these very interesting works. In the revised version of the manuscript these recent works have been added to the references.

**Line 96: I do not understand the phrase “equilibrium between CO<sub>2</sub> and CH<sub>4</sub> in dry tundra environments”. Do you mean the balance between the net flux of the two gases? I suggest to rephrase to make it clear what you mean**

The Authors agree that the statement can be misleading. This aspect is now addressed more clearly in the revised version.

**Bridging the gap between the balance of CO<sub>2</sub> and CH<sub>4</sub> net flux, in dry tundra environments, with the increasing frequency and intensity of extreme events is essential for understanding the role of these ecosystems in the context of climate change.**

**Line 97: You have to mention in the very top of the introduction that one of the predicted changes with the Arctic Amplification is “increasing frequency...”. In this way you tie the introduction better together**

Thank you for the suggestion, now this statement has been added in the revised manuscript.

**Line 100: This sentence is a little off in relation to the text above and below, so I suggest to delete**

Thank you for this suggestion. In the revised version of the manuscript the sentence was deleted.

**Line 103: Write how many years**

This information has now been added in the revised manuscript.

In particular, the objective is to understand the duration and magnitude of the exchange mechanisms and environmental drivers for CO<sub>2</sub> and CH<sub>4</sub> **for two year-rounds** (including the shoulder seasons) and their relative importance.

**Line 105-107: When you write “assess impact on...greenhouse gas fluxes” do you then mean the mechanisms in the soil or the impact on the budget? I think it is important to distinguish as most of your introduction is focused on budgets, which essentially your study design by using eddy is best suited for. So for the reader it is important that you upfront outline whether you focus on mechanistic processes or budgets.**

This aspect is now addressed more clearly in the revised version.

**This study aims to evaluate how seasonal temperature anomalies (1990-2020) affect the GHG budget. These anomalies are used as key indicators to understand how changes in temperature trends influence the overall greenhouse gas balance in the studied ecosystem.**

## **Methods**

### **Measurement site**

**Line 137-140: I guess you mentioning this as it might be affecting measurements occasionally? I think you just have write why you mention this.**

We wish to thank the Reviewer for her/his suggestion. We add a clarification in the sentence, as follow:

On the other hand, there are few combustion engine cars on the roads and some electric vehicles **that might affect measurements occasionally**. The village lacks specific combustion sources, relying entirely on electric facilities. The airport has only two flights per week, and ship arrivals are uncommon, occurring 1-2 times a month, however, cargo handling involves heavy-duty vehicles, and it is moderately active. **All these activities are out of the measurement system footprint**.

### **Eddy covariance data analysis**

**Line 224: You develop a random forest model to account for the complex biogeochemical variables using 12 drivers, but only one is directly related to the soil. Thus, your random forest model is less of a direct model but rather an indirect based on meteorological variables. I would therefore be hesitant to call this a model that can handle complex biogeochemical interactions as you state.**

The authors agree with the Reviewer that this statement is misleading, so this has been clarified in the revised version of the manuscript.

**However, to take in consideration a large range of meteorological interactions and some biogeochemical variables**, a random forest regression model of the fluxes was also developed (Kim et al., 2020, Knox et al., 2021) with 12 environmental drivers: sensible and latent heat fluxes, air temperature, soil temperature at 10 cm depth, relative humidity, vapour pressure deficit, air pressure, shortwave incoming and longwave outgoing radiation, the snow depth, the friction velocity and, finally, the boundary layer height.

### **Results and discussion**

**Line 251 – 270: I think all this text belongs in Methods section, perhaps as a sub chapter to the eddy covariance data analysis section.**

As recommended by the Reviewer, this section has been moved to the previous Section 2.3 “Eddy Covariance”. In the revised version of the paper a new subsection was inserted: **2.4 Seasonality**.

### **3.1 CO<sub>2</sub> and CH<sub>4</sub> mixing ratio**

**Line 300-301: The Wang et al. 2013 is hardly referring to High Arctic conditions and I would not cite this paper here and suggest to use a more suitable one that represents Arctic conditions**

The Reviewer is absolutely right. In this new revised version of the paper we add more references. Wang et al., 2013 refers to a snow covered surface, actually a snow covered temperate forest in central Ontario (Haliburton Forest and Wildlife Reserve). For sure it is not the most appropriate reference for a comparison in this work. In the revised version of this work a series of more suitable references have been added and discussed.

**Line 307: replace “absorption” with “net uptake”. Absorption is a word used in chemistry**

Many thanks for the suggestion. Now the term “absorption” has been changed with the more appropriate “net uptake” throughout the paper.

**Line 297 – 309: In this text you mostly present the median values, but I think you neglect to address the sizable variation of instantaneous fluxes around this median for both CO<sub>2</sub> and CH<sub>4</sub>. Your box plots off course show that most of the fluxes are within the 25<sup>th</sup> and 75<sup>th</sup> percentiles, but regardless of season you have very high variation of fluxes within very short times. For CH<sub>4</sub>, for example, you fluxes range from +10 to -10 nmol m<sup>-2</sup> s<sup>-1</sup>, in what seems to be hours or even shorter (difficult to see on figure 3). Hence, what is behind this large variation in flux estimates. Is it purely stochastic related to the measurement principle due to the high noise-to-signal ratio for CH<sub>4</sub>, at least? I doubt that it can be related to a process that can switch the flux that fast from strong net uptake to strong net emission. Please comment on this in the text.**

Thank you for your insightful question. The eddy covariance method can result in significant variability in turbulent flux measurements, even within short time intervals (< 1 h). This variability is partly due to the intrinsic nature of the eddy covariance technique, where turbulent fluxes are derived from high-frequency measurements that can exhibit substantial instantaneous variation. Our data processing includes filtering based on the limit of detection of 0.9 nmol m<sup>-2</sup> s<sup>-1</sup> (as reported in the text at line 198), ensuring that the reported values are robust and reflective of the actual flux dynamics. The Authors would like to point out that CO<sub>2</sub> fluxes also show a similar temporal variation, with a higher magnitude than methane.



Also, I missing an analysis of the diurnal variation in CO<sub>2</sub> and CH<sub>4</sub> fluxes for the different seasons. One would expect higher variability in summer than in winter. With your data set you are able to make some robust estimates of diurnality. This also feeds in to your overall aim of investigating temporal patterns and drivers of CO<sub>2</sub> and CH<sub>4</sub> fluxes. So I suggest you include this in the manuscript. If there is no clear patterns then you can choose to leave the data out of the paper and merely mention that no differences in diurnal patterns were detected and leave it at that. However, if there are some differences it might serve the overall purpose of your manuscript very well.

Authors thank the Reviewer for her/his valuable suggestion. A response has been provided to a similar question by the Reviewer RC1 in this Biogeosciences open discussion (RC1: 'Comment on egusphere-2024-1440' - <https://doi.org/10.5194/egusphere-2024-1440-RC1>). Please note that daily patterns for different seasons for both CO<sub>2</sub> and CH<sub>4</sub> have now been included here. As referenced by the Reviewer, a diurnal variability in both fluxes can be observed in the summer period. On the other hand, in winter (especially in the dark winter but also during freezing and thawing periods) such diurnal cycles cannot be so clearly distinguished. In particular, the diel pattern for CH<sub>4</sub> is almost absent. Given that no distinct diel cycle is evident at the CCT site, as illustrated in figure R1, we believe this analysis does not significantly enhance the work.

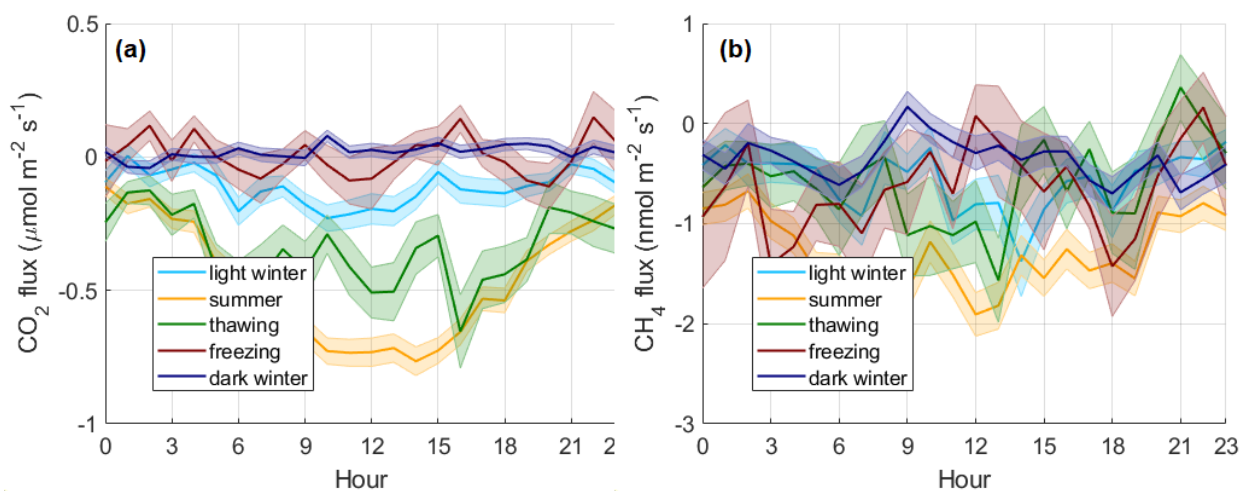

**Figure R1** Diurnal pattern for the a) CO<sub>2</sub> and b) CH<sub>4</sub> flux at our measurement site. The patterns were reported for the different seasons considered in this work. Continuous line represents the mean flux values, while the colour shadow area represents the standard error of the measurements.

### 3.2 CO<sub>2</sub> and CH<sub>4</sub> mass budget

Line 332-333: Unclear what number you refer to in Treat et al. 2016. Please specify whether it is CH<sub>4</sub>. Also there is no comparison to other Arctic CO<sub>2</sub> budgets although there have been measured a lot, so I suggest you compare the CO<sub>2</sub> budgets with other studies.

In the original version of the paper the wrong reference by Treat was reported. In the new version we reported the correct one: Treat et al., 2018, which was added correctly in the references section. We agree with the Reviewer, now in the revised version of the manuscript a comparative analysis with other Arctic studies has been included.

### 3.1 CO<sub>2</sub> and CH<sub>4</sub> mixing ratio and surface fluxes

Seasonal analysis reveals negative median values for the fluxes of CO<sub>2</sub>, peaking in summer with  $-0.37 \mu\text{mol m}^{-2} \text{s}^{-1}$ . **The CO<sub>2</sub> fluxes showed a slightly positive median value during the dark winter ( $0.02 \mu\text{mol m}^{-2} \text{s}^{-1}$ ), actually, due to respiration phenomena from the snow covered surface due to microbial respiration (Hicks Pries et al., 2013). At a finer time scale (30 min resolution), the CO<sub>2</sub> flux trend indicates the presence of positive fluxes (emissions) (Fig. 3a), especially during the dark/light winter and the freezing period (Table 1). As snowmelt begins, accumulated carbon dioxide may be released and exposed patches of ground with a lower albedo begin to warm, further enhancing respiration rates and CO<sub>2</sub>. Further, during thawing season, incoming radiation reaches levels adequate for photosynthesis: the combination of increasing light, along with increases in soil temperatures can result in early photosynthesis. At the CCT site, the CO<sub>2</sub> flux decreased starting from the light winter ( $-0.84 \mu\text{mol m}^{-2} \text{s}^{-1}$ ) and it continues during the thawing season ( $-0.18 \mu\text{mol m}^{-2} \text{s}^{-1}$ ). During the fall, soil temperatures were still adequate for substantial microbial respiration. When the senescence of vascular plants advanced, respiration became the dominant process affecting carbon exchange. In addition, as soils freeze, CO<sub>2</sub> may be forced out of the soil towards the atmosphere. However, in the freezing period, at the CCT site, a median negative CO<sub>2</sub> flux has been measured ( $-0.79 \mu\text{mol m}^{-2} \text{s}^{-1}$ ).**

A similar trend is reported for methane: during the dark and light winter periods, methane fluxes are negative, with a median value of  $-0.17$  and  $-0.36 \text{ nmol m}^{-2} \text{s}^{-1}$ , respectively (Fig. 3d). **Treat et al. (2018) investigated methane dynamics across Arctic sites and reported negative methane fluxes during winter, attributed to cold temperatures, which inhibit methanogenesis while promoting methane oxidation in dry tundra soils. However, they also highlight methane uptake in dry tundra during colder periods. Zona et al. 2016 reported that methane emissions during the cold season (September to May) account for  $\geq 50\%$  of the annual CH<sub>4</sub> flux, with the highest emissions from upland tundra. In this study (Table 1), evidence of significant emission events during winter temperature fluctuations can be observed at the site.** In contrast, these events diminished in the shoulder seasons, where notable net uptake events dominated, with  $-0.83 \text{ nmol m}^{-2} \text{s}^{-1}$  during thawing and  $-0.69 \text{ nmol m}^{-2} \text{s}^{-1}$  during freezing period. **Seasonal analysis reveals negative**

median CH<sub>4</sub> fluxes, peaking in summer at -1.28 nmol m<sup>-2</sup> s<sup>-1</sup>. Juncher Jørgensen et al. (2015) field measurements, within the Zackenberg Valley in northeast Greenland over a full growing season, show methane uptake with a seasonal average of -2.3 nmol m<sup>-2</sup> s<sup>-1</sup> in dry tundra. Wagner et al. (2019) measured a negative peak during the growing season (2009) of -4.41 ng C-CH<sub>4</sub> m<sup>-2</sup> s<sup>-1</sup> in a polar desert area at the Cape Bounty Arctic Watershed Observatory (CBAWO - Melville Island, Canada).

### 3.2 CO<sub>2</sub> and CH<sub>4</sub> mass budget

The cumulative mass budgets over the two monitoring years at the CCT site ecosystem are shown in Fig. 4. Based on the budget for the whole measurement period, the study area acts as a net sink for both CO<sub>2</sub> and CH<sub>4</sub>. During the study period, a CO<sub>2</sub> balance of almost -257 CO<sub>2</sub> g m<sup>-2</sup> is found, while the contribution of CH<sub>4</sub> uptake is estimated at approximately -0.36 g CH<sub>4</sub> m<sup>-2</sup> (Fig. 4, dashed red line). Actually, for the evaluation of the cumulated carbon, the gap filled time series should be considered (both with MDS and RF methodology, see Section 2.3). In this perspective, the total cumulative CO<sub>2</sub> budget over the measurement campaign is -472 g CO<sub>2</sub> m<sup>-2</sup> with MDS and -650 g CO<sub>2</sub> m<sup>-2</sup> using the RF procedure, respectively (Fig. 4a). On the other hand, CH<sub>4</sub> cumulative budget is about -0.76 g CH<sub>4</sub> m<sup>-2</sup> with the RF gap filling procedure (Fig. 4b). The mean annual cumulative CO<sub>2</sub> budget is -131 g CO<sub>2</sub> m<sup>-2</sup> with MDS and -164 g CO<sub>2</sub> m<sup>-2</sup> with RF. **Oechel et al. (2014) reported a net CO<sub>2</sub> uptake during the summer season of -24.3 g C m<sup>-2</sup>, while the no growing seasons released 37.9 g C m<sup>-2</sup>, showing that these periods comprise a significant source of carbon to the atmosphere. In Treat et al. (2024) is reported for 2002–2014, a smaller CO<sub>2</sub> sink in Alaska, Canadian tundra, and Siberian tundra (medians: -5 to -9 g C m<sup>-2</sup> year<sup>-1</sup>). Euskirchen et al. (2012) established eddy covariance flux towers in an Alaska heath tundra ecosystem to collect CO<sub>2</sub> flux data continuously for over three years. They measured a peak CO<sub>2</sub> uptake, during July, with an accumulation of -51 -95 g C m<sup>-2</sup> during June–August. On average, the mean annual cumulative budget for CH<sub>4</sub> is -0.18 g CH<sub>4</sub> m<sup>-2</sup> year<sup>-1</sup>, calculated using gap-filled data (Table 2). This outcome lies within the same order of magnitude estimated by Dutaur et al. (2007) at the global level, reporting a net CH<sub>4</sub> uptake for the non-forested arctic environments (defined as “boreal other”) of -0.14 g CH<sub>4</sub> m<sup>-2</sup> year<sup>-1</sup>. Treat et al. (2018) found that tundra upland varies from CH<sub>4</sub> sink to CH<sub>4</sub> source with a median annual value of 0.0 ± 0.20 g C m<sup>-2</sup> year<sup>-1</sup>. Lau et al., (2015) found that the CH<sub>4</sub> uptake rate was in the range between -0.1 to -0.8 mg CH<sub>4</sub>-C m<sup>-2</sup> day<sup>-1</sup> at AHI site (Nunavut, Canada). In this work it was suggested that mineral cryosols act as a constant active atmospheric CH<sub>4</sub> sink (Emmerton et al., 2014) in part because of their low soil organic carbon availability, low vegetation cover and low moisture content.**

The annual budget can be further split into the five seasons considered in this study. Specifically, the CCT area acted as a CO<sub>2</sub> sink during the thawing and summer period with an average value of -0.79 and -1.1 g CO<sub>2</sub> m<sup>-2</sup> day<sup>-1</sup>, respectively. **During the freezing period the quantity of absorbed CO<sub>2</sub> per day decreased down to almost null value (-0.01 g CO<sub>2</sub> m<sup>-2</sup> day<sup>-1</sup>), and slightly increased to a positive value during the dark winter period (0.04 g CO<sub>2</sub> m<sup>-2</sup> day<sup>-1</sup>). With the increasing amount of the solar radiation, the mass cumulative CO<sub>2</sub> per day decreased again (-0.25 g CO<sub>2</sub> m<sup>-2</sup> day<sup>-1</sup> for light winter).** Ueyama et al. (2014) analysed seasonal CO<sub>2</sub> budgets across several tundra ecosystems in Alaska, reporting peak CO<sub>2</sub> uptake during summer with an average value of -46 g C m<sup>-2</sup> due to maximum photosynthesis rates. The same pattern was followed by the CH<sub>4</sub> absorbed carbon mass: in this case during the thawing period was observed a value on average of -0.55 mg CH<sub>4</sub> m<sup>-2</sup> day<sup>-1</sup>, peaking its negative maximum during the summer period (-1.29 mg CH<sub>4</sub> m<sup>-2</sup> day<sup>-1</sup>). Also, in this case the absorbed carbon mass decreases in the freezing period down to -0.63 mg CH<sub>4</sub> m<sup>-2</sup> day<sup>-1</sup>. It was reduced to very low values during the winter season with -0.26 mg CH<sub>4</sub> m<sup>-2</sup> day<sup>-1</sup> in dark winter and -0.40 mg CH<sub>4</sub> m<sup>-2</sup> day<sup>-1</sup> in light winter.

Dutaur, L., and Verchot, L.V.: A global inventory of the soil CH<sub>4</sub> sink. *Global Biogeochem. Cycles*, 21, 4013. <https://doi.org/10.1029/2006GB002734>, 2007.

Emmerton, C. A., St Louis, V. L., Lehnherr, I., Humphreys, E. R., Rydz, E., and Kosolofski, H. R.: The net exchange of methane with high Arctic landscapes during the summer growing season, *Biogeosciences*, 11, 3095–3106, <https://doi.org/10.5194/bg-11-3095-2014>, 2014.

Euskirchen, E. S., Bret-Harte, M. S., Scott, G. J., Edgar, C., and Shaver, G. R.: Seasonal patterns of carbon dioxide and water fluxes in three representative tundra ecosystems in northern Alaska, *Ecosphere*, 3(1):4, <http://dx.doi.org/10.1890/ES11-00202.1>, 2012.

Hicks Pries, C.E., Schuur, E.A.G. and Crummer, K.G.: Thawing permafrost increases old soil and autotrophic respiration in tundra: Partitioning ecosystem respiration using δ<sup>13</sup>C and Δ<sup>14</sup>C. *Glob. Change Biol.*, 19, 649–661, doi: 10.1111/gcb.12058, 2013

Juncher Jørgensen, C., Lund Johansen, K. M., Westergaard-Nielsen, A., and Elberling, B.: Net regional methane sink in High Arctic soils of northeast Greenland, *Nat. Geosci.*, 8, 20–23, <https://doi.org/10.1038/ngeo2305>, 2015.

Lau, M. C. Y., Stackhouse, B. T., Layton, A. C., Chauhan, A., Vishnivetskaya, T. A., Chourey, K., Ronholm, J., Myktyczuk, N. C. S., Bennett, P. C., Lamarche-Gagnon, G., Burton, N., Pollard, W. H., Omelon, C. R., Medvigy, D. M., Hettich, R. L., Pfiffner, S. M., Whyte, L. G., and Onstott, T. C.: An active atmospheric methane sink in high Arctic mineral cryosols, *ISME J.*, 9, 1880–1891, 2015.

Oechel, W. C., Laskowski, C. A., Burba, G., Gioli, B., and Kalhori, A. A. M.: Annual patterns and budget of CO<sub>2</sub> flux in an Arctic tussock tundra ecosystem. *J. Geophys. Res. Biogeosci.*, 119, 323–339, doi:10.1002/2013JG002431, 2014.

Treat, C. C., Virkkala, A.-M., Burke, E., Bruhwiler, L., Chatterjee, A., Fisher, J. B., et al.: Permafrost carbon: Progress on understanding stocks and fluxes across northern terrestrial ecosystems, *J. Geophys. Res.-Biogeo.*, 129, e2023JG007638, <https://doi.org/10.1029/2023JG007638>, 2024.

Treat, C.C, Bloom, A.A, Marushchak, M.E.: Nongrowing season methane emissions—a significant component of annual emissions across northern ecosystems. *Glob. Change Biol.*, 24:3331–3343, <https://doi.org/10.1111/gcb.14137>, 2018

Ueyama, M., Iwata, H., Harazono, Y., Euskirchen, E. S., Oechel, W. C., & Zona, D. (2014). *Growing season and spatial variations of carbon fluxes of Arctic and boreal ecosystems in Alaska (USA)*. *Ecological Applications*, **24**(8), 1798–1816. doi:10.1890/13-0725.1

Wagner, I., Hung, J. K. Y., Neil, A., and Scott, N. A.: Net greenhouse gas fluxes from three High Arctic plant communities along a moisture gradient, *Arct. Sci.*, 5, 185–201, <https://doi.org/10.1139/as-2018-0018>, 2019.

Zona, D., Gioli, B., Commane, R., Lindaas, J., Wofsy, S. C., Miller, C. E., Dinardo, S. J., Dengel, S., Sweeney, C., Karion, A., Chang, R.-W., Henderson, J. M., Murphy, P. C., Goodrich, J. P., Moreaux, V., Liljedahl, A., Watts, J. D., Kimball, J. S., Lipson, D. A., and Oechel, W. C.: Cold season emissions dominate the Arctic tundra methane budget, *P. Natl. Acad. Sci. USA*, 113(1), 40–45, <https://doi.org/10.1073/pnas.1516017113>, 2016.

### **3.3 Physical drivers on GHGs surface fluxes**

**Line 357: I think you refer to Fig. 5b and not “9b”**

Ok, many thanks for the suggestion.

**Line 372-375: I think the discussion on methanotrophy in Type I and implicitly Type II is off here and not really relevant as you have to assume that it is aerobic methanotrophy that is responsible for the net uptake, but whether it is one type of methanotrophs or the other is irrelevant in your case as you cannot really evaluate this. If you were to say anything then you would have to assume that it is type II (high affinity MOB's) that do the oxidation as there are no wetlands in the CCT footprint.**

The paragraph indicated by the Reviewer has been deleted from the revised text.

**Line 375-377: This is more a conclusive statement and I would remove from here and add to conclusions if needed**

We agree that this statement is more appropriate for the conclusions. It has been removed from its original position and incorporated into the conclusion section as recommended.

**Line 386-388: But on the other hand windspeed is higher in winter with the lowest fluxes. And given the low range of wind speeds I doubt that you will find a strong link between net CH<sub>4</sub> uptake rates and wind speed. You are correct that oxygen addition to deeper layers is likely stimulating methane oxidation, but this is as much related to the drying out of the soil during the summer. Since you say the CCT is also a semi-desert my best interpretation is that the CH<sub>4</sub> flux regulation is most directly related to the soil hydrology, indirectly affected by the wind that can dry the soil, rather than it is actually mechanical mixing of oxygen into the soil. Remember**

also, that methane oxidation requires one O<sub>2</sub> molecule. Thus, the oxygen requirement is very low compared to how much O<sub>2</sub> there is in the air, it is several orders of magnitude. So I would also assume that even at atmospheric stability or inversion and when the soil diffusion was not restricted by water (summer and freezing) O<sub>2</sub> supply would not be limiting CH<sub>4</sub> oxidation. I therefore have difficulty in attributing turbulent vertical atmospheric O<sub>2</sub> mixing as the primary stimulant of soil profile CH<sub>4</sub> oxidation. Research points to that this is regulated by soil hydrology and porosity. I therefore suggest you to moderate this claim and include how wind may act to dry the soil and hence increase diffusivity for O<sub>2</sub> and atmospheric CH<sub>4</sub>. However, the problem is that you do not have direct soil moisture measurements to support this claim, but still I think it is a more feasible explanation that has been shown in other studies.

In the revised version of the manuscript, we add a figure (Fig.5b) with the scatter plot of CH<sub>4</sub> flux vs wind velocity (as suggested by the Reviewer). Also, the text within the manuscript was heavily changed accordingly.

**High temporal resolution measurements of CO<sub>2</sub> and CH<sub>4</sub> facilitate looking at the underlying causes of emissions, looking, for example, at the relationship between meteorological/flux variables and CH<sub>4</sub> fluxes (Taylor et al., 2018). Further, the importance of soil net CH<sub>4</sub> uptake is poorly constrained, but it is widely recognised that soil temperature, soil moisture, and substrate availability (CH<sub>4</sub> and O<sub>2</sub>) are the main drivers of the temporal variations of observed and predicted net CH<sub>4</sub> fluxes (D'Imperio et al., 2024). Juncher Jørgensen et al. (2024) incubation studies revealed that subsurface CH<sub>4</sub> oxidation is the main driver of net surface-atmosphere exchange, and it responds clearly to changes to soil moisture in these dry upland environments. The production, consumption, and transport processes of CH<sub>4</sub> are primarily related to hydrology, vegetation, and microbial activities (Vaughn et al., 2016; Wang et al, 2022). In this work any soil hydrology measurements were available for understanding these processes, however the measured wind velocity and soil temperature have been used as proxies for soil moisture and water table depth.** Previous works have shown that advection, forced by wind pumping related to atmospheric turbulence, can increase turbulent fluxes from/to the snowpack (Sievers et al., 2015). Typically, the wind pumping effect led to increased emissions flux in CO<sub>2</sub> resulting from ebullition and/or ventilation. This correlation is analysed for the snow-covered periods (dark/light winter) in our measurement site (Fig.5a). **The scatter plot in Fig. 5a shows a quadratic relationship (the equation of the fit is reported in the figure, R<sup>2</sup>=0.91) between wind speed and vertical turbulent CO<sub>2</sub> flux, with a clear increasing trend indicating positive fluxes for wind**

speed above  $3 \text{ m s}^{-1}$ . From a similar analysis, but in this case for the whole measurement period, for the  $\text{CH}_4$  fluxes (Fig.5b), it can be observed, in this case too, a quadratic relationship with the wind velocity ( $R^2 = 0.98$ ). In the range of low wind velocity  $\text{CH}_4$  exchange balance is on median values very close to zero but going to greater wind speed ( $>10 \text{ m s}^{-1}$ ) the negative  $\text{CH}_4$  flux (uptake) increases.

Despite the Reviewer's valid observations that rightly point to soil hydrology measurements for understanding these processes, we unfortunately do not have any measurements available that can support such analyses. In the revised manuscript the Reviewer's explanation of the process has been inserted, as follow:

**Overall, the observed correlation in the ecosystem uptake of methane with wind velocity suggests that the methanotrophic communities in the Svalbard soils might be stimulated by soil aeration, strongly related to its drying out during the summer. Since the CCT is also a semi-desert surface, the  $\text{CH}_4$  uptake regulation is most directly related to the porosity and soil hydrology (not measured in this study), indirectly affected by the wind that can dry the soil and increase diffusivity for atmospheric oxygen.**

### **3.4 GHGs fluxes response to seasonal temperature anomalies**

**Line 400 Do you mean net annual  $\text{CO}_2$  uptake?**

Yes, we mean the net annual  $\text{CO}_2$  uptake

**Line 401-402: This statement would be easier to interpret if the temp-anomaly vs  $\text{CO}_2$  plot were split into seasons. Perhaps do this as a supplementary figure?**

The Reviewer is right. A comprehensive response has been provided to a similar question by the Reviewer RC1 in this Biogeosciences open discussion (RC1: 'Comment on egusphere-2024-1440' - <https://doi.org/10.5194/egusphere-2024-1440-RC1>). In response to the Reviewer's suggestion, we produced a new figure where the trends relative to the different seasons, taken in consideration in this work, were carried out separately (Fig. R2 and Fig.R3). In each panel is reported also the equation of the best fit for the binned data. Black squares represent the flux data binned for  $\Delta T$  bins ( $5 \text{ }^\circ\text{C}$  large). Error bars represent the standard errors. In Fig.R2 and in Fig.R3 has been reported a linear fit also for the union of dark winter and light winter datasets, taken together to increase the statistical



significance. Finally, we decided to insert in the revised version of the manuscript only some panels of Fig.R2 and Fig.R3. Specifically, we created only one figure, both for CO<sub>2</sub> and CH<sub>4</sub>, inserting “Winter Snow”, “Summer” and “Thawing” for each gas in a 3x2 frame. All the cases have been well described in the text.

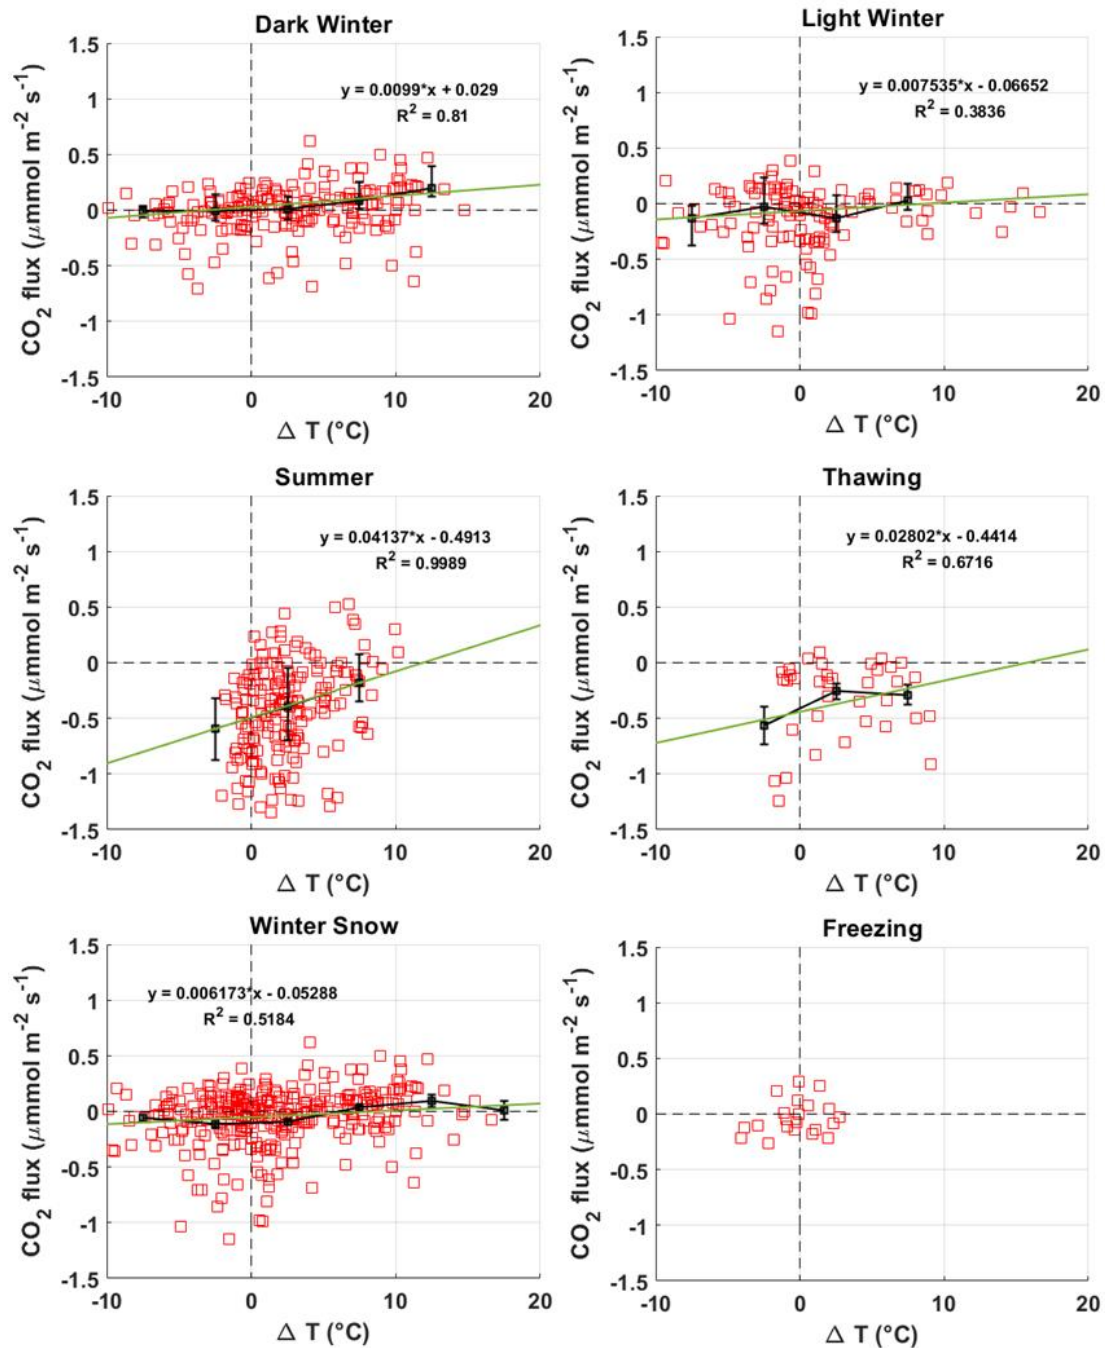

**Figure R2** CO<sub>2</sub> vertical fluxes vs temperature anomalies for the different seasons (as reported in the title panel). A linear fit equation and the respective Pearson coefficient (R<sup>2</sup>) are reported for each panel.



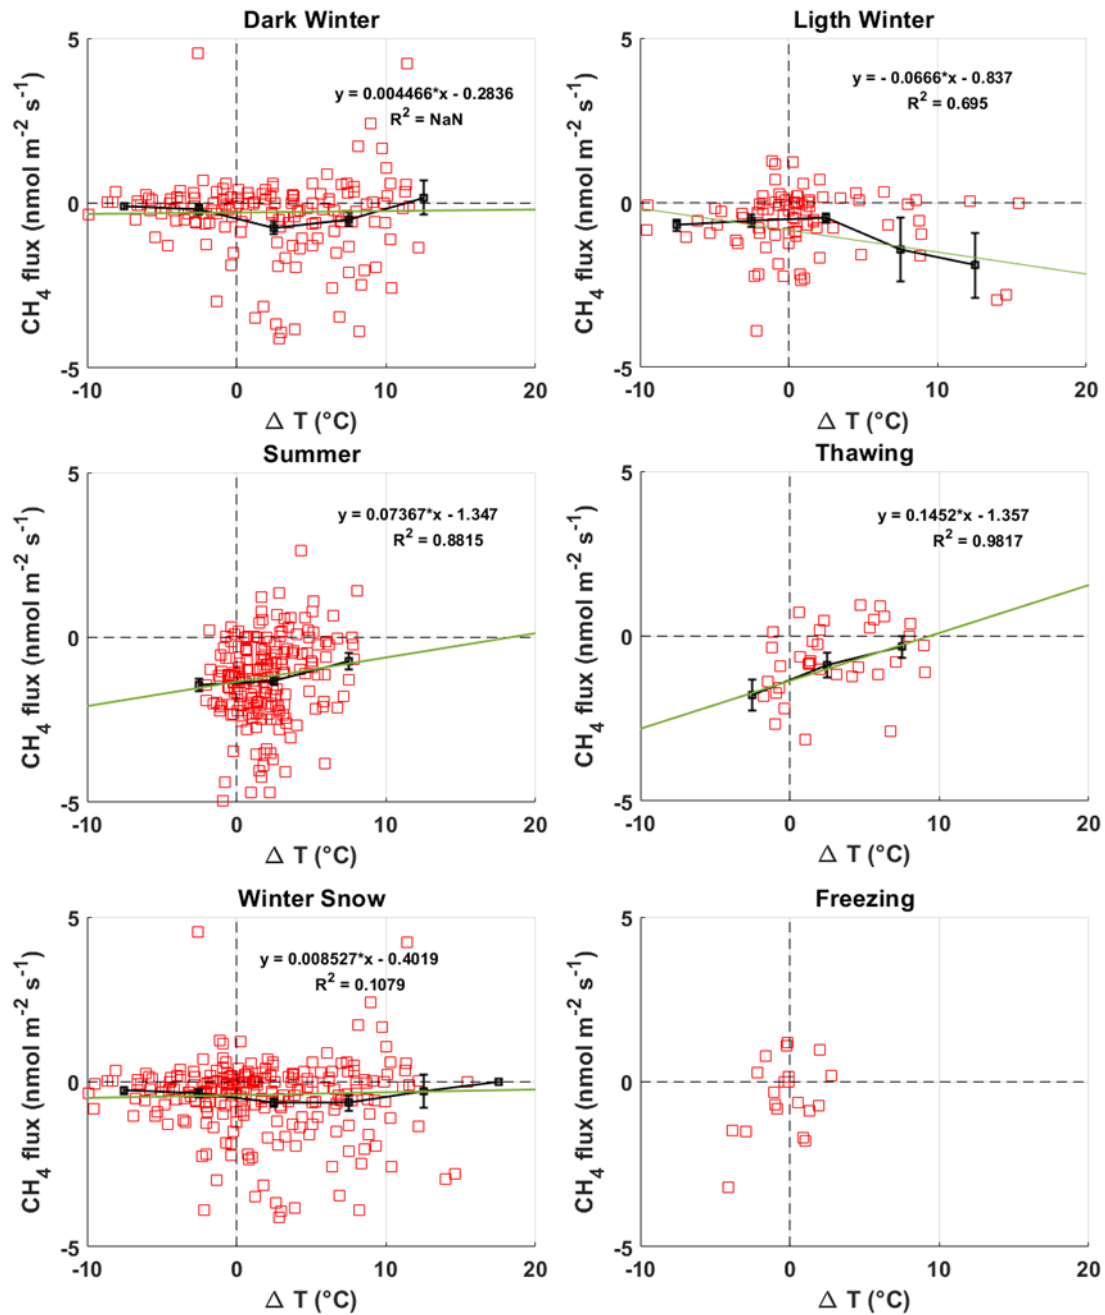

**Figure R3** CH<sub>4</sub> vertical fluxes vs temperature anomalies for the different seasons (as reported in the title panel). A linear fit equation and the respective Pearson coefficient ( $R^2$ ) are reported for each panel.

**Line 411-412: Difficult formulation. I do not understand what you mean. I suggest to rephrase. Is this transition in the same direction in summer or winter or in opposite directions and hence what is the impact of the annual net CO<sub>2</sub> sink? If the transition to higher net CO<sub>2</sub> emissions with temp anomaly is the same for summer and winter then the net annual CO<sub>2</sub> uptake decreases, but if the transition is opposite in winter and summer then they may cancel out. I think this is what you mean by the sentence, but I am not sure. Sorry for the confusion.**

In the revised version of the paragraph, the text was intensively modified. The sentence which the Reviewer refers to was rephrased as follow:

**Overall, the results suggest a transition of CO<sub>2</sub> and CH<sub>4</sub> flux regimes to an emissive scenario (reduced net uptake) for thermal anomalies above 10°C for all the periods considered, especially for the winter, where the thermal anomalies have a greater relative magnitude.**

### **Conclusions**

**Line 424: “increasing aeration” In my opinion and from knowledge of these soil types, they dry out fast in the spring if not snow covered. This is maybe because of wind, but likely also because of a relatively low albedo**

The Reviewer is absolutely right. In the new form of the sentence, we put in evidence the albedo effect

**... and correlates with the increasing aeration (wind effect) of the topsoil and its decreasing albedo.**

**Line 428: “reducing any further biological activity.” I suggest to delete this part of the sentence as it does not really add meaning to this conclusion**

Thanks a lot for the suggestion. Now, this sentence has been deleted.

**Line 431-433: A weakness here of the conclusion that “other environmental variables” control CH<sub>4</sub> uptake is that you have not measured soil moisture content which is at the core of this increase. Solar radiation and wind plays a role in the speed of drying, but the soil material and structure ultimately determines how much it dries under the given climatic conclusion. I suggest you attempt to include more reflections on the role of soil moisture and that you may have a missing link here in your study.**

Despite the Reviewer's valid observations that rightly point to soil hydrology measurements for understanding these processes, we unfortunately do not have any measurements available that can support such analyses. In the Conclusion Section, now, we include a sentence which involves more reflections on the role of soil moisture and the lack of this type of measurements in our work.

**The CH<sub>4</sub> fluxes at CCT exhibited a limited association with both soil and ambient temperature in contrast to other environmental factors, such as the soil moisture and water table depth. Solar radiation and wind play a role in the speed of drying, but the soil material and structure ultimately determine how much it dries under the given climatic conditions. Overall, the observed correlation in the ecosystem uptake of methane with wind velocity suggests that the methanotrophic communities in the Svalbard soils are stimulated by oxygen uptake, strongly related to its drying out during the summer.**

**Line 433-434: I do not think this is the case. For example, Jørgensen et al. 2015 that you also cite shows that methanotrophs in dry tundra has a Q<sub>10</sub> of 2, which does not indicate a lesser temperature dependency. Rather it is likely that the variation in CH<sub>4</sub> uptake is not limited by temperature, but by other factors.**

In the new version of the manuscript this sentence has been deleted.

**Line 434-435: I think you have an indirect effect of the wind, but via the soil hydrology as mentioned above. Furthermore, this correlation is not presented and the reader cannot assess if it a strong or as weak a correlation with the soil temperature. So I would be careful in concluding like this here and rather moderate the discussion in throughout the text.**

Ok, we wish to thank the Reviewer again, in the new form of the manuscript all these issues should be resolved.

**Line 438: Maybe add here after "...CO<sub>2</sub>" "both in summer and winter periods, effectively reducing the net annual uptake." I think this is an important finding.**

Many thanks for the suggestion. In the new form of the paper, we added the suggested sentence.

**Line 438-439: Rather it is the opposite. Higher temperatures would stimulate plant growth if not limited by water and hence higher GPP. But if higher GPP is counterbalanced or even exceeded by more frequent temp-anomaly driven CO<sub>2</sub> emissions in summer and winter the annual net effect may actually be an overall decrease. The way you write it here indicates that**

**CO<sub>2</sub> respiration from increasing temp inhibits plant productivity, but this is not the case. So rephrase to avoid this mistake.**

The Reviewer is right. Now, in the new form of the paper, the sentence was rephrased as follow:

**The analysis of the impact of thermal anomalies on CO<sub>2</sub> and CH<sub>4</sub> exchange fluxes, underscores that high positive (> 5 °C) thermal anomalies may contribute to an increased positive flux both in summer and winter periods, effectively reducing the net annual uptake. Warming in permafrost ecosystems leads to increased plant and soil respiration that is initially compensated by an increased net primary productivity.**

**Figures**

**Really nice figures 1 – 6**

Thanks a lot for your comment.

**Figure 4 – lower panel for CH<sub>4</sub>. Check y-axis title. There seems to be an “m” too much**

Thanks for your suggestion. The y-axis label now is corrected.

**Figure 6 – In the caption the black line is not explained. Also, I would suggest to show this figure split into the different seasons, so in order to more clearly see if seasons behave similarly or different.**

In response to the Reviewer's suggestion, we produced a new figure (Fig. 6) where the trends relative to the different seasons, taken in consideration in this work, were carried out separately.
